# Supplementary material for: Contribution of ammonia oxidation to chemoautotrophy in Antarctic coastal waters
Source: PubMed Central journal article supplement — ISME J. 2016 May 17;10(11):2605–19. doi: 10.1038/ismej.2016.61 (PMC5113851; doi:10.1038/ismej.2016.61), 2016-05-17
Supplement: ismej201661x7.pdf [file ismej201661x7.pdf]

Supplementary Table 6. Contribution of the ammonia oxidation to carbon fixation and bacterioplankton production in Antarctic coastal waters

| Water Mass                             | Water mass persistence (months) | Water mass thickness (m) | Mean measured AO rate <sup>a</sup> (nmol L <sup>-1</sup> d <sup>-1</sup> ) | Integrated AO rate (mmol m <sup>-2</sup> d <sup>-1</sup> ) | Annual integrated AO rate <sup>b</sup> (mol yr <sup>-1</sup> ) | Annual integrated AO rate (Tg yr <sup>-1</sup> ) | Ammonia oxidizer C fixation <sup>c</sup> (mole C m <sup>-2</sup> yr <sup>-1</sup> ) | Production of ammonia oxidizer biomass <sup>d</sup> (gC m <sup>-2</sup> yr <sup>-1</sup> ) |
|----------------------------------------|---------------------------------|--------------------------|----------------------------------------------------------------------------|------------------------------------------------------------|----------------------------------------------------------------|--------------------------------------------------|-------------------------------------------------------------------------------------|--------------------------------------------------------------------------------------------|
| AASW - Fall, Winter and Spring         | 8                               | 100                      | 62                                                                         | 6.2                                                        | 4.47E+12                                                       | 63                                               | 0.15                                                                                | 0.67                                                                                       |
| WW Summer                              | 4                               | 50                       | 14                                                                         | 0.7                                                        | 2.52E+11                                                       | 4                                                | 0.01                                                                                | 0.04                                                                                       |
| SSW* - Summer                          | 4                               | 50                       | 1.4                                                                        | 0.1                                                        | 2.52E+10                                                       | 0                                                | 0.001                                                                               | 0.004                                                                                      |
| CDW - Fall, Winter and Spring          | 8                               | 375                      | 21                                                                         | 7.9                                                        | 5.68E+12                                                       | 79                                               | 0.19                                                                                | 0.85                                                                                       |
| CDW Summer                             | 4                               | 375                      | 25                                                                         | 9.4                                                        | 3.38E+12                                                       | 47                                               | 0.11                                                                                | 0.51                                                                                       |
| <b>Continental Shelf Total 0-475 m</b> |                                 |                          |                                                                            |                                                            |                                                                | <b>193</b>                                       | <b>0.5</b>                                                                          | <b>2.1</b>                                                                                 |

a) From this study, SSW AO rate not measured, assumed to be 10% of WW

b) Integrated over the entire Antarctic continental shelf (area from Supplemental Table 5a).

c) Assumes 1 mole C fixed per 10 moles ammonia oxidized from Berg et al. (2015)

d) Assumes 1 mole of biomass C produced per 27 moles of ammonia oxidized (from Konneke et al 2005, Martens-Habben et al. 2009, Ward 2011, Berg et al 2015)

| Month                                                                                                                                         | Days | Photoautotrophic C Fixation Rate <sup>a</sup> (gC m <sup>-2</sup> d <sup>-1</sup> ) | Photoautotrophic C Fixation (mole C m <sup>-2</sup> month <sup>-1</sup> ) |
|-----------------------------------------------------------------------------------------------------------------------------------------------|------|-------------------------------------------------------------------------------------|---------------------------------------------------------------------------|
| November                                                                                                                                      | 30   | 0.72                                                                                | 1.8                                                                       |
| December                                                                                                                                      | 31   | 1.52                                                                                | 3.9                                                                       |
| January                                                                                                                                       | 31   | 1.48                                                                                | 3.8                                                                       |
| February                                                                                                                                      | 28   | 1.02                                                                                | 2.4                                                                       |
| March                                                                                                                                         | 31   | 0.72                                                                                | 1.9                                                                       |
| April                                                                                                                                         | 30   | 0.61                                                                                | 1.5                                                                       |
| <b>Annual Continental Shelf Photoautotrophic C Fixation, mole C m<sup>-2</sup> yr<sup>-1</sup></b>                                            |      |                                                                                     | <b>15</b>                                                                 |
| <b>Annual Continental Shelf Chemoautotrophic C Fixation supported by ammonia oxidation<sup>b</sup>, mole C m<sup>-2</sup> yr<sup>-1</sup></b> |      |                                                                                     | <b>0.5</b>                                                                |
| <b>Ratio of Chemoautotrophy to Photoautotrophy, %</b>                                                                                         |      |                                                                                     | <b>3.0%</b>                                                               |

a) from Table 2 in Arrigo et al. 1998, assumes rate = 0 in months other than those listed

b) From Supplementary Table 6a above

| Date <sup>a</sup>                                                                                                             | Annual Vertically Integrated Photoautotrophic C Fixation (mole C m <sup>-2</sup> yr <sup>-1</sup> ) |
|-------------------------------------------------------------------------------------------------------------------------------|-----------------------------------------------------------------------------------------------------|
| 1997-1998                                                                                                                     | 8.8                                                                                                 |
| 1999-2000                                                                                                                     | 11.6                                                                                                |
| 2000-2001                                                                                                                     | 6.0                                                                                                 |
| 2001-2002                                                                                                                     | 9.7                                                                                                 |
| 2002-2003                                                                                                                     | 0.4                                                                                                 |
| 2003-2004                                                                                                                     | 6.5                                                                                                 |
| 2004-2005                                                                                                                     | 5.6                                                                                                 |
| 2005-2006                                                                                                                     | 16.3                                                                                                |
| <b>Average</b>                                                                                                                | <b>8.1</b>                                                                                          |
| <b>Annual Continental Shelf Chemoautotrophic C Fixation supported by ammonia oxidation<sup>b</sup>, mole C m<sup>-2</sup></b> | <b>0.5</b>                                                                                          |
| <b>Ratio of Chemoautotrophy to Photoautotrophy, %</b>                                                                         | <b>5.7</b>                                                                                          |

a) From Table 4, Ducklow et al. (2008) for the period Dec-Feb, assumes rate = 0 in other months

b) From Supplementary Table 6a above

| Depth Range of Integration                                                                     | gC m <sup>-2</sup> d <sup>-1</sup> |
|------------------------------------------------------------------------------------------------|------------------------------------|
| 0-150 m                                                                                        | 25.2                               |
| 150-475 m <sup>a</sup>                                                                         | 45.8                               |
| <b>Bacterioplankton Production Fall, Winter and Spring (gC m<sup>-2</sup>)</b>                 | <b>17.3</b>                        |
| <b>Production by Ammonia Oxidizers Fall, Winter and Spring<sup>b</sup> (gC m<sup>-2</sup>)</b> | <b>1.5</b>                         |
| <b>Contribution of Ammonia Oxidizers to Winter Bacterioplankton Production (%)</b>             | <b>8.8</b>                         |

a) From Table 1 in Manganelli et al. (2009); value given (84.5) adjusted for differences in depths of integration (750 vs 475 m)

b) Derived from information in Supplementary Table 6a above

| Depth Range                                                                                            | Bacterioplankton production, mmolC m <sup>-2</sup> d <sup>-1</sup> |                          |                   |                          |
|--------------------------------------------------------------------------------------------------------|--------------------------------------------------------------------|--------------------------|-------------------|--------------------------|
|                                                                                                        | Early Spring 96 (Oct-Nov)                                          | Late summer 97 (Jan-Feb) | Autumn 97 (April) | Late Spring 97 (Nov-Dec) |
| 0-50                                                                                                   | 0.1                                                                | 6.6                      | 0.2               | 0.4                      |
| 50-150                                                                                                 | 0.2                                                                | 5.0                      | 0.5               | 0.3                      |
| 150-300                                                                                                | 0.2                                                                | 2.4                      | 0.7               | 0.2                      |
| 300-475 <sup>a</sup>                                                                                   | 0.3                                                                | 2.8                      | 0.8               | 0.2                      |
| Water Column Total                                                                                     | 0.8                                                                | 16.9                     | 2.2               | 1.1                      |
| Time Period (months of the year)                                                                       | Oct-Dec <sup>b</sup>                                               | Jan-Mar                  | Apr-Jun           | Jul-Sept <sup>b</sup>    |
| Vertically Integrated Rate (mmol C m <sup>-2</sup> d <sup>-1</sup> )                                   | 87                                                                 | 1539                     | 205               | 87                       |
| <b>Annual Integrated Bacterioplankton Production Rate, 0-475 m (gC m<sup>-2</sup> yr<sup>-1</sup>)</b> | <b>23.0</b>                                                        |                          |                   |                          |
| <b>Production by Ammonia Oxidizers</b>                                                                 | <b>2.1</b>                                                         |                          |                   |                          |
| <b>Contribution of Ammonia Oxidizers to Bacterioplankton Production</b>                                | <b>9.0</b>                                                         |                          |                   |                          |

a) 150-300 m rate assumed, adjusted for water column thickness

b) Average of Early Spring and Late Spring rates used in calculation
